# Supplementary material for: Disabled People or Their Support Persons’ Perceptions of a Community Based Multi-Sensory Environment (MSE): A Mixed-Method Study
Source: MDPI journal article supplement (doi:10.3390/ijerph20196805), 2023-09-22
Supplement: s1 [file s1]

Table S1 – Multisensory Room E-survey Codebook

| Question # | Variable                | SPSS variable name | Coding instructions                                                                                                                                                                                                                                                                                                                                                                                                                                                                                                                                                                                                                                                                                      |
|------------|-------------------------|--------------------|----------------------------------------------------------------------------------------------------------------------------------------------------------------------------------------------------------------------------------------------------------------------------------------------------------------------------------------------------------------------------------------------------------------------------------------------------------------------------------------------------------------------------------------------------------------------------------------------------------------------------------------------------------------------------------------------------------|
|            | Identification number   | ID                 | Number assigned to each questionnaire                                                                                                                                                                                                                                                                                                                                                                                                                                                                                                                                                                                                                                                                    |
| Q1         | Questionnaire completer | Completer          | 1 = Room user<br>2 = Support person<br>3 = Parent/Caregiver                                                                                                                                                                                                                                                                                                                                                                                                                                                                                                                                                                                                                                              |
| Q2         | Age                     | Age                | Age in years, recoded to NZ Ministry of Education funding models of four categorical groups.<br>1 = 0-4,<br>2 = 5-21,<br>3 = 22-64<br>4 = 65 plus<br><br>For secondary analysis of relationships between variables age recoded to<br>1 = Under 21<br>2 = Over 21                                                                                                                                                                                                                                                                                                                                                                                                                                         |
| Q3         | Ethnicity               | Ethnicity          | Used NZ Statistics Department standard ethnicity question.<br>1=New Zealand European<br>2=Māori: Please give the name(s) and region(s) of your iwi (tribe or tribes)<br>3=Samoan<br>4=Cook Island Māori<br>5=Tongan<br>6=Niuean<br>7=Chinese<br>8=Indian<br>9=Other such as Dutch, Japanese, Tokelauan. Please state:<br><br>Recoded as:<br>1=NZEuro<br>2=Māori<br>3=Other<br><br>A particular interest of the Trust was to find out how many Māori used the MSE, any person who identified as Māori were categorised as Māori and all other respondents were categorised as non-Māori.<br>For secondary analysis of relationships between variables, ethnicity recoded to<br>1 = Māori<br>2 = Non=Māori |

Table S1 – Multisensory Room E-survey Codebook

|            |                                                                                                                         |               |                                                                                                                                                                                                                                                               |
|------------|-------------------------------------------------------------------------------------------------------------------------|---------------|---------------------------------------------------------------------------------------------------------------------------------------------------------------------------------------------------------------------------------------------------------------|
| Q4         | Region                                                                                                                  | Location      | 1= Canterbury<br>2 = Other, South Island<br>3 = North Island                                                                                                                                                                                                  |
| Q5         | Who accompanies person                                                                                                  | Companion     | 1 = No<br>2 = Yes                                                                                                                                                                                                                                             |
| Q6         | Transport                                                                                                               | Transport     | 1= Bike<br>2 = Bus<br>3 = Car<br>4 = Mini Van<br>5 = Walk<br>6 = Other                                                                                                                                                                                        |
| Q7         | Frequency of use                                                                                                        | Frequency     | 1 = Every 1 -2 weeks<br>2 = Monthly<br>3 = 2-4 times a year<br>4 = Yearly<br>5 = Other<br><br>For secondary analysis of relationships between variables, frequency recoded to<br>1 = Monthly or more frequently<br>2 = 2 – 4 times year<br>3 = Yearly or less |
| Q8         | Barriers to access                                                                                                      | Accessibility | Reviewed for themes then coded                                                                                                                                                                                                                                |
| Q9         | WG-SS                                                                                                                   | WG-SS         | WG-SS recoded to:<br>1 = has disability (A lot of difficulty, Cannot do at all)<br>2 = no disability (No difficulty, Some difficulty)<br>With 'A lot' or 'Cannot do at all' in any type of limitation codes as Yes = Disabled                                 |
| Q10, 14-15 | Long-answer - factors influencing decision to attend, how to advertise MSE, other information to support MSE experience |               | Reviewed for themes                                                                                                                                                                                                                                           |
| Q12        | Accessibility barriers                                                                                                  | Barriers      | 1=yes (if yes please explain)<br>Explanations provided reviewed for themes.<br>2=no                                                                                                                                                                           |

Table S1 – Multisensory Room E-survey Codebook

|  |  |  |                                |
|--|--|--|--------------------------------|
|  |  |  | Reviewed for themes then coded |
|--|--|--|--------------------------------|
